# Supplementary material for: What Does Our Personality Say About Our Dietary Choices? Insights on the Associations Between Dietary Habits, Primary Emotional Systems and the Dark Triad of Personality
Source: Front Psychol. 2019 Nov 22;10:2591. doi: 10.3389/fpsyg.2019.02591 (PMC6883900; doi:10.3389/fpsyg.2019.02591)
Supplement: Supplementary file 1 [file Data_Sheet_1.xlsx]

## Sheet: Raw data
Supplementary file: Raw data Study 2
Sex	Age	Education	EBQ_01	EBQ_02	EBQ_03	EBQ_04	EBQ_05	EBQ_06	EBQ_07	EBQ_08	EBQ_09	EBQ_10	EBQ_11	EBQ_12	SD3_01	SD3_02	SD3_03	SD3_04	SD3_05	SD3_06	SD3_07	SD3_08	SD3_09	SD3_10	SD3_11	SD3_12	SD3_13	SD3_14	SD3_15	SD3_16	SD3_17	SD3_18	SD3_19	SD3_20	SD3_21	SD3_22	SD3_23	SD3_24	SD3_25	SD3_26	SD3_27
1	23	5	4	0	1	7	4	7	3	3	2	4	2	4	3	4	3	4	1	2	4	3	2	2	4	3	1	4	4	1	3	3	4	3	2	3	2	5	5	5	4
2	22	3	4	0	2	7	3	3	3	4	2	7	2	3	4	4	2	1	2	3	2	4	1	3	2	1	1	4	2	1	4	1	2	2	5	3	4	3	4	4	2
1	29	4	4	0	2	4	1	2	3	2	2	3	2	3	4	3	2	2	3	2	4	3	2	3	2	2	3	3	4	3	4	3	4	2	3	3	4	2	4	4	4
2	24	5	4	0	2	5	3	4	5	2	1	7	2	1	4	4	2	2	2	4	1	1	1	2	3	1	4	1	2	1	3	2	2	2	5	1	3	1	4	3	1
2	19	5	4	0	1	4	2	1	3	2	1	7	2	2	4	3	4	4	3	4	4	2	2	4	2	1	3	3	4	4	3	3	4	1	5	3	1	1	4	3	3
2	18	5	4	0	1	5	2	3	3	1	1	7	2	2	3	4	1	2	2	3	4	2	1	4	4	3	1	1	2	1	4	1	4	1	5	1	1	1	2	4	2
1	24	5	4	0	1	4	1	1	4	1	1	6	2	5	2	2	1	2	3	4	1	1	1	2	3	1	1	2	2	1	4	2	3	2	2	1	1	1	4	2	1
2	20	5	4	0	1	4	3	3	5	2	2	5	2	2	3	4	2	4	3	2	3	2	4	3	2	2	2	3	2	3	4	4	4	3	4	3	3	2	4	4	3
2	18	5	4	0	1	2	3	5	5	2	2	4	3	4	3	3	1	1	2	4	1	2	1	1	1	1	1	1	1	1	2	1	2	2	4	1	3	1	2	2	2
2	19	5	1	3	1	7	1	1	5	1	1	7	3	1	4	3	1	2	2	3	5	2	1	1	4	1	1	1	1	1	4	2	3	1	4	3	3	1	3	4	1
1	28	7	4	0	7	7	1	3	4	1	2	7	5	1	3	3	3	2	2	3	3	3	2	3	3	1	1	3	2	3	3	3	3	3	5	3	2	3	3	3	2
2	23	7	4	0	1	7	1	2	2	2	2	7	2	1	3	3	1	1	2	3	2	1	1	3	1	1	1	1	1	1	5	1	3	1	5	3	2	1	2	3	1
2	19	5	4	0	1	2	4	3	4	3	2	6	4	5	3	3	2	4	2	5	2	4	2	4	2	1	2	2	4	5	3	4	5	2	5	4	2	1	4	5	1
2	30	7	4	0	1	4	2	2	2	3	2	6	3	3	4	4	1	3	3	5	4	2	1	2	4	2	2	4	2	2	4	1	2	2	4	2	3	1	2	4	3
2	59	7	4	0	2	5	2	3	3	2	2	5	4	2	2	3	2	2	2	4	5	3	3	3	3	2	2	2	1	2	4	3	3	3	5	3	4	1	4	4	4
2	20	5	4	0	1	6	3	3	4	2	2	5	3	3	4	4	3	1	2	5	4	1	3	4	4	1	3	1	5	1	4	3	1	1	1	3	2	2	4	4	2
2	32	7	4	0	7	7	3	4	1	1	2	4	3	4	3	4	1	1	4	3	2	3	1	3	1	1	1	1	1	1	4	1	1	1	2	1	1	1	1	1	1
2	23	5	4	0	2	4	2	2	4	2	2	6	3	2	4	4	1	1	2	4	2	4	1	4	4	1	2	1	2	1	4	4	4	4	5	1	1	1	1	5	1
2	19	5	1	1	1	7	1	1	4	1	1	7	4	1	2	3	3	2	4	4	3	3	3	2	2	3	4	3	2	3	3	3	2	2	3	4	4	4	3	3	3
2	22	5	4	0	3	5	2	3	4	2	1	6	3	2	2	2	3	3	4	3	2	2	2	3	2	1	1	1	3	1	4	2	2	1	3	1	4	3	3	4	2
2	25	6	2	3	1	4	1	3	1	1	1	7	2	1	3	3	2	4	4	4	4	2	3	4	3	1	3	1	3	3	1	3	4	1	5	3	3	1	4	3	3
2	21	5	4	0	1	7	1	2	4	2	2	7	4	3	3	3	1	3	4	5	4	3	1	3	4	1	2	4	1	1	5	2	5	1	5	3	1	1	4	4	1
2	21	5	4	0	1	2	1	3	5	2	1	3	2	2	3	2	1	1	2	5	5	2	1	4	4	1	1	5	4	1	5	2	1	2	5	1	5	1	1	4	4
1	18	5	4	0	1	4	7	4	4	3	2	7	4	3	3	2	1	2	4	4	5	3	1	4	3	1	1	4	2	1	3	1	4	2	5	3	4	1	4	4	2
2	18	5	4	0	1	6	5	3	5	2	1	7	3	2	5	4	1	2	3	4	3	2	1	1	2	1	1	2	1	1	4	2	2	1	5	1	3	2	3	3	1
2	19	5	1	3	1	7	1	1	5	1	1	7	2	1	2	4	3	1	2	4	5	3	1	2	5	1	1	4	2	1	2	2	2	1	4	1	1	1	5	3	1
2	22	6	4	0	7	7	2	4	2	2	2	7	1	2	5	4	2	3	3	3	4	3	2	5	4	3	2	3	2	2	4	4	4	3	3	2	2	3	3	4	3
2	19	5	4	0	3	7	2	2	3	2	2	7	5	3	3	3	1	1	5	4	3	2	1	4	2	1	1	1	1	1	4	1	4	1	4	2	4	1	4	4	2
2	25	6	4	0	2	4	1	2	4	1	1	7	4	2	4	1	1	2	2	4	3	2	1	2	3	1	1	2	2	1	4	2	4	1	5	2	4	1	4	4	2
2	20	5	4	0	2	5	3	2	3	2	2	3	2	2	4	3	1	1	4	4	5	4	1	3	2	1	1	1	1	1	5	1	1	1	5	1	4	1	3	3	1
2	26	5	4	0	3	7	2	6	4	2	2	7	5	2	4	3	3	4	2	4	4	2	4	4	3	2	3	2	3	2	4	4	4	3	4	3	4	1	4	4	4
2	21	5	4	0	1	5	2	2	3	2	2	5	5	3	3	2	1	2	2	4	4	2	2	4	2	1	3	2	1	3	4	3	4	2	5	3	2	1	4	4	4
2	19	5	4	0	3	2	2	2	4	1	1	6	1	2	3	4	1	1	2	4	3	4	1	4	3	1	1	2	5	1	2	3	4	1	1	1	1	3	4	3	1
1	22	5	4	0	7	5	4	5	5	4	2	4	4	4	5	2	4	2	5	4	3	2	1	2	2	2	4	1	4	5	4	5	5	2	1	4	1	2	5	1	2
1	22	5	4	0	1	4	2	2	5	4	2	3	1	2	4	3	2	1	3	5	1	1	1	4	3	1	2	1	1	1	4	3	4	2	5	2	1	3	2	4	2
2	20	5	2	2	1	7	1	1	1	1	1	7	1	1	4	2	2	1	5	5	2	2	1	2	1	1	1	1	2	1	4	2	4	2	5	3	4	1	1	3	1
2	53	2	4	0	2	7	1	2	3	2	2	7	4	1	3	2	1	1	5	4	1	1	1	1	1	1	1	1	1	1	3	1	4	1	1	1	3	1	4	4	1
2	20	5	4	0	5	6	5	6	6	2	1	6	2	6	2	2	1	1	2	4	2	2	3	4	2	3	2	1	2	1	2	2	2	2	5	2	4	1	2	4	2
1	20	5	4	0	2	7	4	5	5	3	2	7	3	5	4	3	1	2	2	4	4	4	1	2	2	1	3	4	2	2	4	2	4	1	4	2	2	1	4	4	2
2	20	5	4	0	1	7	2	5	6	2	2	6	3	3	4	3	2	1	5	5	3	1	2	4	3	1	1	1	2	1	4	1	4	1	5	2	2	1	1	5	1
2	25	5	4	0	1	7	2	3	4	1	4	7	1	2	4	3	2	1	3	3	5	2	2	2	2	2	1	1	3	2	4	3	4	2	4	3	2	3	3	4	3
2	20	5	4	0	1	7	3	2	4	3	2	7	2	3	4	2	2	3	2	4	3	2	2	2	3	1	2	2	2	2	4	3	4	2	3	3	4	1	3	4	3
2	21	5	4	0	2	7	1	4	2	2	1	7	4	2	3	3	1	1	3	2	2	3	1	1	1	1	1	1	1	1	4	1	2	1	4	4	4	1	1	4	1
1	23	7	4	0	2	4	4	4	3	2	2	6	3	4	4	4	4	4	3	2	4	4	4	5	4	1	4	4	5	4	5	4	4	4	4	4	1	2	4	4	4
2	19	5	4	0	2	7	3	4	3	2	2	7	3	2	3	2	1	1	3	3	3	2	1	4	3	2	1	2	3	1	4	2	3	1	2	2	3	1	2	4	2
2	53	3	4	0	2	7	3	4	4	2	2	6	3	1	5	1	1	4	4	4	2	2	3	1	2	1	1	1	1	1	4	1	2	1	2	1	4	1	4	4	1
2	24	7	2	6	3	5	1	3	4	1	1	7	2	1	2	1	1	1	2	4	1	2	1	1	3	1	1	1	1	1	4	1	4	1	1	1	4	1	4	5	1
1	23	5	4	0	7	7	2	1	5	2	2	5	3	5	3	2	3	2	2	4	1	1	1	2	1	1	1	1	1	4	3	2	4	1	4	1	3	3	3	3	3
2	22	5	4	0	3	7	2	4	5	2	2	4	4	5	4	2	1	3	4	5	5	1	1	2	1	1	1	2	1	1	4	1	2	1	5	1	5	2	2	3	2
1	29	7	4	0	2	4	3	5	2	3	2	5	4	4	5	4	3	4	2	3	4	3	2	3	4	2	4	4	2	1	4	3	4	2	3	3	2	3	4	4	3
2	20	5	4	0	6	7	2	3	4	2	2	7	3	3	4	4	1	1	2	3	4	4	3	4	2	1	2	3	4	4	3	1	5	1	5	3	2	2	3	5	3
2	24	5	4	0	2	4	2	4	2	5	2	5	2	6	4	4	4	4	2	5	4	4	4	2	3	2	4	3	5	4	2	3	4	2	3	2	2	4	4	4	3
2	21	5	4	0	3	7	1	3	2	3	2	6	3	4	1	4	1	1	1	5	1	2	1	4	4	1	5	4	2	1	4	1	4	3	5	4	1	1	3	4	2
2	19	5	2	3	3	6	1	4	3	1	1	6	4	1	2	2	1	2	4	4	2	2	1	2	2	1	1	1	2	1	4	2	3	2	4	2	4	3	4	3	3
2	21	5	4	0	2	6	2	5	5	3	3	6	4	6	5	2	1	2	2	4	2	2	1	4	2	1	3	2	2	1	4	2	5	1	5	2	3	1	4	3	2
2	20	5	4	0	2	7	3	4	3	3	2	7	3	3	3	3	1	4	1	2	4	2	2	2	3	2	4	4	4	2	4	2	4	4	4	3	3	2	4	4	2
2	20	5	4	0	1	7	5	3	5	2	1	7	5	4	2	1	1	1	3	4	4	2	2	2	2	2	2	4	4	2	4	2	4	2	2	3	2	2	4	4	2
2	20	5	2	6	2	7	1	1	6	1	1	7	6	1	4	2	3	1	2	3	2	1	4	4	2	4	2	3	4	2	4	1	5	1	5	1	4	4	5	3	4
2	25	5	4	0	2	5	2	2	2	2	2	7	2	2	4	2	3	2	3	4	3	2	3	4	2	3	3	2	3	3	4	3	3	2	4	2	4	2	3	3	3
2	20	5	4	0	3	3	3	2	4	3	1	7	2	3	2	1	1	1	4	3	3	3	1	5	1	1	1	1	1	1	5	3	4	1	5	3	5	2	1	1	1
2	19	5	4	0	3	6	2	2	6	2	1	6	3	1	3	1	3	1	4	4	4	1	1	5	3	1	2	1	1	3	5	2	5	2	5	2	4	3	5	4	1
2	19	5	4	0	4	7	1	4	2	1	2	7	3	2	4	3	1	1	5	5	5	2	3	1	2	1	2	2	4	4	4	1	5	1	5	3	2	2	4	4	2
2	27	7	2	3	1	7	1	2	4	1	1	7	2	1	3	3	1	2	2	3	2	3	1	2	2	1	2	2	2	3	3	3	4	2	4	3	2	1	4	4	2
2	20	5	4	0	3	7	2	2	3	2	1	6	5	2	4	2	1	2	5	4	5	2	1	4	3	1	1	1	2	1	4	2	3	1	3	2	4	1	4	4	2
2	20	5	4	0	1	3	3	3	4	2	2	6	4	6	3	1	1	1	4	5	5	3	1	4	2	1	1	2	1	1	4	1	2	1	5	5	4	1	1	1	2
2	20	5	4	0	1	4	4	4	5	2	2	4	2	4	3	2	1	1	3	4	3	2	2	3	3	1	1	2	1	1	4	2	4	2	5	3	3	1	3	4	2
2	19	5	4	0	6	6	1	2	2	2	2	5	2	2	4	4	2	3	1	1	1	3	4	4	2	1	3	3	1	4	2	4	4	2	4	4	3	1	4	4	2
2	20	5	4	0	1	7	2	2	4	1	1	6	4	2	4	3	2	1	4	4	4	3	1	4	3	2	2	2	2	2	4	2	4	2	4	3	4	2	4	4	2
1	22	5	4	0	5	5	1	6	3	5	2	6	2	3	3	4	1	1	3	3	5	3	1	3	3	1	1	1	1	1	3	1	5	3	5	5	4	1	3	5	1
2	25	3	4	0	1	3	2	1	3	1	1	3	1	2	4	4	1	1	4	3	1	3	2	3	3	2	2	2	2	2	4	4	4	3	4	3	3	1	3	4	2
2	21	5	4	0	1	7	1	1	2	2	1	7	2	2	3	2	2	2	4	4	3	2	2	3	3	3	2	3	2	2	4	2	4	2	4	3	4	2	2	4	3
2	20	5	4	0	1	6	2	1	4	1	1	7	3	2	2	2	1	1	4	4	1	2	1	2	1	1	1	1	2	1	4	1	4	1	5	1	4	1	2	2	1
2	36	5	4	0	3	5	2	3	3	2	2	6	2	3	3	3	1	2	4	3	3	1	1	1	2	1	1	1	3	1	5	3	2	1	2	3	2	2	3	3	1
2	24	5	4	0	2	7	1	3	4	2	3	5	5	4	4	3	1	1	4	4	3	3	3	2	1	1	1	1	1	3	4	3	4	1	5	3	4	1	3	3	1
2	20	5	2	3	4	4	1	4	3	1	1	7	4	1	2	2	1	1	4	2	2	3	1	2	3	1	1	2	2	1	4	1	4	2	5	1	5	1	2	5	1
2	20	5	4	0	1	7	2	4	3	2	2	7	2	2	4	2	1	1	3	4	2	2	1	4	3	1	1	2	1	1	4	1	4	1	1	3	1	1	4	4	1
2	19	5	2	3	4	7	1	1	4	1	1	7	3	1	5	3	1	1	3	4	2	3	1	2	2	1	1	2	1	1	4	1	3	2	5	1	2	1	2	4	1
1	19	5	4	0	3	7	5	6	6	5	3	7	5	6	5	3	4	3	2	2	5	3	4	1	2	2	5	4	1	4	2	4	5	2	5	4	4	5	5	4	5
1	18	3	4	2	1	5	1	1	3	1	1	3	6	1	3	2	2	4	1	2	4	2	4	4	1	1	4	1	4	1	5	3	5	1	5	2	2	4	5	3	2
1	27	5	4	0	4	6	1	6	3	3	2	6	4	4	5	3	3	3	3	3	3	3	3	3	3	3	3	4	2	2	4	3	3	2	2	3	4	2	2	2	2
2	19	5	2	2	2	7	1	2	6	1	1	7	3	1	4	2	1	1	4	5	2	3	1	2	1	1	1	1	2	1	4	1	4	1	4	3	4	1	2	2	1
2	19	5	4	0	4	4	3	3	3	3	2	5	3	3	3	4	1	1	3	4	1	3	1	3	3	1	1	1	2	1	2	1	3	3	5	1	1	1	1	3	1
2	50	3	4	0	1	2	4	2	4	2	1	2	3	3	3	2	2	1	4	4	2	1	1	2	2	1	1	1	1	1	4	1	2	1	5	2	4	1	3	4	1
1	21	4	4	0	3	7	6	7	3	4	2	7	7	3	5	4	1	1	4	2	4	1	1	4	4	1	1	3	2	1	4	1	5	2	2	3	4	4	2	4	1
2	22	4	4	0	1	1	4	4	4	3	2	5	3	4	3	4	4	1	3	4	5	1	1	1	5	2	3	4	3	1	4	3	4	4	5	2	1	5	5	5	1
1	24	3	4	0	1	6	6	4	5	5	2	5	5	4	4	4	1	1	2	1	3	2	1	4	3	1	1	1	1	1	4	1	5	1	5	1	1	1	4	4	1
2	19	5	2	3	1	7	1	1	4	1	1	7	4	1	2	1	1	1	5	4	2	1	1	1	1	1	1	1	1	1	4	1	5	1	4	1	4	4	3	4	1
2	20	5	4	0	1	5	3	2	1	1	2	6	1	1	4	3	1	1	1	4	3	2	1	3	3	1	1	1	2	3	2	3	2	1	5	3	3	1	3	5	1
1	73	7	4	0	2	4	3	5	5	3	4	4	4	5	4	2	2	2	2	2	3	3	3	3	3	3	3	2	3	4	4	3	3	2	4	4	2	2	3	4	3
2	22	5	4	0	2	7	2	2	4	2	2	5	3	3	4	3	2	2	4	4	3	2	2	3	3	2	3	3	2	2	4	2	5	2	5	3	4	1	3	4	2
1	31	3	4	0	2	7	4	2	5	4	4	7	7	4	3	4	1	1	2	4	2	2	1	2	3	1	1	1	1	1	4	1	3	3	4	4	3	1	3	4	1
2	52	7	4	0	1	7	3	2	2	2	2	7	3	2	4	4	1	4	2	3	3	3	1	3	3	1	1	1	3	2	4	3	3	1	4	3	2	1	4	4	2
1	63	7	4	0	1	6	3	2	3	2	2	4	3	2	5	3	2	3	3	4	3	2	3	4	3	1	2	3	4	3	4	3	4	1	5	3	5	2	2	4	1
2	69	3	4	0	1	7	2	4	2	4	4	7	2	4	5	4	3	3	5	4	4	2	1	3	4	1	1	4	2	2	4	2	4	3	4	3	2	1	4	4	3
2	19	5	4	0	5	4	2	2	5	1	1	5	2	2	4	3	1	2	3	3	2	3	1	3	3	1	1	1	4	4	4	2	5	1	5	2	3	1	5	4	1
2	25	5	4	0	1	7	2	1	3	1	1	7	3	2	2	2	1	1	2	5	2	1	1	3	1	1	1	1	2	1	4	1	2	1	5	1	2	1	5	4	1
2	22	5	4	0	1	7	2	4	1	2	2	7	1	2	1	2	5	3	3	2	3	3	5	1	3	4	3	2	1	2	2	2	4	1	4	2	3	4	3	5	4
2	20	5	4	0	6	6	4	3	3	3	2	5	2	4	3	2	1	1	3	4	4	2	1	3	1	1	1	3	1	1	4	1	4	1	5	3	4	1	2	3	1
1	19	5	4	0	1	5	6	2	5	4	3	6	3	4	2	4	2	4	2	1	4	3	2	2	2	4	2	2	2	2	3	4	4	4	1	2	4	2	4	4	4
1	23	7	4	0	2	6	2	2	3	2	2	4	2	2	4	3	2	3	3	3	4	3	1	4	3	1	2	3	2	2	3	2	4	2	4	3	4	1	4	4	2
2	21	5	4	0	2	6	2	2	3	1	2	6	3	2	3	1	1	2	4	4	3	1	1	2	1	1	1	1	2	1	4	3	4	1	5	3	4	1	3	4	2
2	21	5	4	0	2	4	1	3	3	2	2	3	3	2	5	1	3	5	4	5	3	1	1	5	4	1	4	4	5	5	5	3	5	1	5	4	1	1	5	5	3
1	52	7	4	0	2	4	4	4	4	3	3	5	4	3	5	3	4	4	5	2	4	2	3	2	3	1	3	3	2	5	4	4	3	2	2	3	2	3	4	4	1
1	24	3	4	0	1	5	4	3	4	2	2	6	4	4	2	4	4	4	2	4	4	2	3	5	3	1	4	4	4	3	2	4	5	1	4	2	2	1	5	5	4
2	24	7	4	0	1	7	2	5	6	4	2	6	3	2	3	4	3	3	4	4	2	3	2	4	3	1	2	2	2	2	4	2	4	1	5	3	4	2	3	4	4
1	23	7	4	0	4	7	3	6	5	2	2	7	4	4	5	4	1	2	3	4	4	2	1	5	2	1	2	2	2	2	3	3	4	1	4	3	4	1	4	3	2
2	27	7	4	0	2	7	2	3	6	2	2	7	2	2	2	3	2	1	3	5	3	1	1	3	1	1	1	1	2	1	4	1	2	1	5	1	4	1	3	2	2
1	47	7	4	0	7	7	1	5	2	1	2	6	4	2	3	4	2	2	3	2	4	2	2	4	1	1	1	1	1	2	3	2	4	1	4	3	2	2	3	2	2
2	21	5	4	0	1	7	1	1	3	2	1	7	4	2	4	2	1	1	5	5	3	1	1	3	1	1	1	1	1	1	4	3	2	1	5	1	3	1	2	3	1
2	22	5	4	0	2	6	3	4	3	3	4	4	1	4	3	4	2	4	1	2	4	4	2	4	4	2	3	3	3	3	4	3	3	3	2	4	3	2	4	4	4
2	21	7	4	0	2	6	2	3	4	2	2	7	4	2	5	3	1	3	3	4	3	3	2	3	2	1	3	2	3	3	4	3	2	1	5	1	1	1	5	4	4
1	25	7	4	0	1	4	4	5	6	4	4	4	4	4	4	3	3	2	2	4	4	2	1	3	3	1	3	2	2	3	4	3	4	1	4	1	3	3	4	4	2
2	20	5	4	0	1	5	2	4	3	1	2	7	5	2	2	3	2	1	3	4	4	4	2	2	2	1	1	1	1	3	4	2	4	1	5	2	4	2	2	4	1
2	54	6	4	0	6	6	2	3	6	2	2	6	3	2	2	3	1	1	3	5	1	1	1	2	1	1	1	1	1	1	2	1	3	1	5	1	4	1	1	4	1
1	21	5	4	0	3	5	3	2	4	3	2	5	3	2	4	4	3	2	2	5	4	3	1	4	3	1	2	3	2	3	4	3	4	2	2	3	2	3	3	4	4
2	21	5	2	3	1	7	1	3	4	1	1	7	2	1	4	2	1	1	4	5	3	2	1	5	2	1	2	2	1	1	5	1	2	2	1	3	4	2	3	5	2
2	50	5	4	0	2	7	2	2	2	3	2	7	2	4	4	4	1	2	3	4	4	1	1	1	4	1	1	2	1	1	1	1	1	1	5	1	1	1	4	4	1
2	69	3	4	0	4	7	3	4	2	2	2	6	2	2	4	1	2	1	4	5	1	1	1	2	1	1	1	1	1	1	4	2	4	1	5	4	4	1	4	4	1
2	19	5	4	0	3	6	1	2	5	2	1	6	2	3	3	2	2	3	2	5	5	2	3	4	4	1	2	2	3	3	4	2	2	3	4	3	4	2	4	4	3
2	22	5	4	0	2	7	3	5	3	3	3	7	6	4	4	2	2	2	3	4	3	4	2	4	3	1	2	3	4	2	2	2	4	2	2	2	2	2	2	4	2
2	57	7	2	3	2	7	1	3	2	1	1	7	3	1	3	1	1	2	5	3	2	2	2	3	3	1	1	1	1	1	4	1	4	1	4	3	3	1	4	3	1
2	18	5	4	0	1	6	3	2	2	2	1	7	2	2	2	2	1	1	3	4	4	3	1	4	4	1	1	1	2	1	4	2	4	2	5	3	3	1	4	5	1
2	74	2	4	0	1	7	5	1	2	4	1	6	6	4	2	2	3	2	4	4	3	3	2	2	3	4	3	4	2	4	3	4	4	1	5	3	4	1	2	4	4
1	54	4	4	0	1	5	5	3	4	2	2	3	3	1	5	4	3	2	2	4	3	2	1	2	2	1	2	2	1	1	2	3	4	1	5	3	3	1	4	4	2
2	19	5	4	0	2	7	2	3	2	2	2	4	2	2	3	4	1	2	3	4	3	2	1	1	2	1	1	1	2	1	4	1	2	1	5	1	4	1	4	4	1
2	31	2	4	0	4	5	2	3	5	4	3	7	2	2	4	4	1	1	4	4	4	1	4	2	1	1	1	1	2	2	4	2	4	1	4	2	4	1	4	4	1
2	24	5	4	0	1	7	2	3	3	2	2	7	3	3	3	4	1	3	2	4	1	3	1	1	3	1	1	1	3	1	4	2	1	1	5	1	4	1	3	3	2
2	24	5	4	0	2	7	1	2	3	1	3	7	2	2	2	3	1	2	3	4	3	3	1	3	2	1	2	2	2	1	4	1	2	1	5	2	4	2	2	4	2
1	22	3	4	0	2	6	4	3	4	3	3	4	4	3	4	3	2	2	3	4	2	2	2	2	2	2	4	3	2	4	4	4	4	1	2	2	4	3	4	4	2
2	20	4	4	0	1	7	5	3	3	1	3	7	4	4	3	4	1	1	2	2	5	3	1	1	4	1	1	2	2	1	4	2	2	1	5	2	4	1	2	3	2
1	71	6	4	0	4	6	2	4	2	2	2	3	3	2	4	4	2	3	5	4	4	2	1	2	2	1	1	2	2	1	3	2	4	1	4	2	2	1	3	4	2
1	45	6	4	0	2	7	4	3	4	2	2	3	3	2	3	2	3	2	3	4	4	2	1	2	2	1	1	1	1	2	2	3	2	2	3	2	2	2	3	4	2
2	22	5	4	0	2	5	1	1	6	4	1	5	3	2	5	1	1	1	4	5	3	2	1	2	2	2	1	2	2	2	4	2	3	1	4	3	3	1	1	2	2
2	21	5	4	0	1	7	2	4	5	1	1	7	3	2	4	4	1	1	2	5	4	3	1	5	3	1	2	3	2	1	5	2	4	1	1	3	4	1	3	4	2
1	33	7	4	0	2	7	3	2	1	3	2	7	1	6	3	2	1	1	2	3	3	2	3	1	1	1	1	1	1	1	4	1	4	1	1	3	5	2	2	4	1
2	25	5	4	0	1	7	2	4	2	3	4	7	1	3	3	3	1	1	3	4	4	4	1	5	2	2	2	4	1	1	4	1	4	1	3	2	4	2	3	4	2
2	21	5	4	0	4	7	1	2	4	1	1	7	3	1	2	4	4	3	5	4	2	1	1	1	4	1	1	1	3	2	4	2	4	2	5	2	4	1	2	4	3
2	22	5	4	0	2	7	2	3	3	2	2	4	3	2	5	4	2	2	2	4	2	2	3	4	1	1	1	1	2	3	4	3	4	2	5	3	5	1	2	4	2
1	60	4	4	0	1	4	2	2	3	3	2	4	3	3	5	2	2	2	4	4	4	2	3	3	3	2	3	1	1	2	4	2	4	2	2	2	3	2	2	3	2
1	26	2	4	0	1	2	4	2	2	2	1	2	2	2	5	3	1	2	4	1	2	3	1	2	2	3	1	3	2	1	4	2	4	1	4	2	4	2	4	4	1
1	23	5	4	0	6	6	4	2	4	2	1	4	1	3	4	3	4	2	5	4	3	2	2	4	1	1	4	3	3	3	5	2	4	2	5	3	2	1	4	5	2
2	47	4	4	0	1	5	3	3	4	1	2	7	3	2	1	4	1	1	2	2	1	1	1	1	4	1	1	1	1	1	2	1	1	1	3	2	2	1	1	3	1
1	23	5	2	3	1	7	1	2	3	1	1	6	3	1	2	4	4	4	2	2	5	3	1	1	3	4	5	2	4	4	4	4	3	2	1	4	2	1	2	3	1
1	53	7	4	0	2	6	3	4	3	3	2	5	3	3	4	2	1	1	2	2	3	2	1	2	2	1	1	2	2	1	2	1	2	1	2	3	2	3	2	3	2
1	52	4	4	0	1	4	2	4	3	2	3	4	3	2	5	3	1	1	3	4	4	2	1	1	2	1	2	3	1	1	2	1	4	1	2	2	2	2	3	2	2
2	26	3	4	0	6	5	3	3	2	2	2	5	4	3	2	4	1	2	5	3	4	2	1	1	3	3	2	3	4	3	4	2	4	1	4	2	1	1	2	4	1
2	22	5	4	0	1	7	1	2	3	1	3	7	5	4	3	3	2	2	4	4	3	2	1	3	3	1	1	1	1	3	4	1	4	1	5	3	3	1	4	5	2
2	21	5	4	0	2	7	3	4	4	2	1	6	4	3	4	5	1	1	2	4	5	2	1	3	2	1	1	1	1	1	4	1	4	1	5	3	4	1	3	4	3
2	27	7	4	0	2	7	2	2	4	2	2	7	4	2	2	3	1	1	2	4	4	2	1	4	4	2	1	1	1	1	3	1	3	1	2	1	2	3	1	4	3
2	20	4	4	0	1	6	5	3	2	5	2	5	3	3	2	2	1	2	3	4	4	2	1	4	2	1	1	2	4	2	5	3	4	1	5	4	2	1	4	4	2
2	21	5	4	0	3	7	2	2	2	2	2	7	3	3	2	2	1	1	4	5	5	2	1	1	1	1	1	1	2	1	5	1	4	1	5	1	1	1	1	5	1
2	50	3	4	0	2	7	5	4	4	2	2	7	3	2	4	2	1	1	5	5	1	1	1	2	2	1	1	1	1	2	4	2	4	1	5	3	4	1	2	3	2
2	21	5	2	3	1	7	1	1	2	1	1	7	3	1	4	3	2	2	4	4	3	3	4	4	2	1	2	2	2	4	5	3	4	2	5	3	2	1	4	4	2
1	52	7	4	0	1	7	1	1	2	2	5	5	2	2	1	5	3	4	2	2	5	4	3	5	4	1	3	4	2	4	4	2	4	4	2	4	1	1	5	5	2
2	51	5	2	3	1	7	1	4	4	1	1	7	3	1	2	2	1	2	2	5	1	2	1	1	2	1	1	1	1	1	4	1	3	1	5	1	2	1	3	3	1
1	20	5	4	0	1	6	1	6	3	4	1	4	4	6	4	4	2	3	2	2	4	3	4	3	4	1	1	4	2	4	4	3	5	3	5	3	3	2	5	5	4
2	21	5	2	3	3	7	1	3	5	1	1	4	5	1	4	1	2	1	5	1	4	2	1	1	1	1	1	1	4	1	5	2	5	1	4	3	4	1	1	5	2
2	25	5	4	0	1	2	2	3	4	2	4	7	3	3	3	5	2	2	2	4	2	3	2	3	3	2	3	3	3	4	3	4	4	1	2	3	4	1	4	4	3
2	18	5	4	0	1	6	1	3	3	2	3	5	3	2	3	4	1	1	3	3	1	2	1	3	2	1	1	2	1	1	2	2	4	1	5	3	2	2	4	2	1
1	48	3	4	0	1	1	3	3	3	1	1	1	1	1	4	2	2	2	1	5	4	1	3	2	1	1	4	2	4	3	4	1	1	1	1	4	4	1	4	3	3
2	19	5	4	0	1	7	2	2	5	1	2	7	2	3	2	3	1	1	2	2	2	1	1	1	1	1	1	2	1	1	4	2	4	1	2	2	4	1	5	5	1
1	20	5	4	0	1	5	3	4	5	2	2	6	5	2	4	4	2	4	4	3	4	2	4	1	3	1	4	1	3	5	3	3	4	1	5	2	3	1	4	4	3
2	20	5	4	0	2	7	2	2	3	2	1	6	3	2	3	2	1	1	4	5	3	2	1	3	4	1	1	1	2	1	4	2	4	1	5	1	3	1	3	4	1
2	22	5	4	0	7	7	2	5	2	2	1	5	2	4	4	4	3	4	3	2	2	4	1	1	2	1	1	1	1	1	4	1	3	1	4	1	3	2	4	4	1
1	24	5	4	0	2	3	4	3	3	2	2	3	3	2	5	3	2	3	4	5	5	1	1	5	1	1	4	5	2	4	5	5	5	4	2	3	2	2	3	5	4
2	18	3	2	3	1	3	1	3	6	1	1	7	2	1	4	3	2	3	2	4	3	2	4	3	2	2	3	2	4	4	4	4	4	2	5	4	4	1	3	3	2
2	22	5	2	3	1	7	1	4	4	1	1	7	3	1	4	1	2	2	5	4	1	1	1	2	2	1	1	1	4	1	4	1	4	1	5	2	4	2	4	4	1
2	19	5	4	0	2	4	4	3	2	2	2	7	3	5	3	4	2	4	3	4	3	3	4	2	4	1	2	4	4	2	4	2	4	3	5	3	4	1	3	4	2
2	21	5	4	0	1	5	1	1	4	1	2	7	3	2	3	4	1	1	4	4	2	3	1	4	3	1	1	3	1	3	4	3	4	1	4	2	4	1	4	5	2
2	52	7	4	0	3	7	2	3	5	2	2	7	3	2	3	1	1	1	3	4	3	2	1	2	2	1	1	1	1	1	3	1	3	1	5	2	3	1	3	4	1
2	18	4	4	0	7	7	5	3	4	2	2	7	6	4	5	3	1	3	3	4	4	2	1	4	1	1	3	2	4	2	5	1	2	1	5	3	4	1	3	4	2
2	27	7	4	0	1	3	2	2	4	2	2	7	2	2	4	3	1	1	2	4	3	3	1	2	3	2	1	1	1	1	4	1	4	1	4	1	3	1	2	4	1
2	58	3	4	0	2	7	3	3	4	2	2	7	4	2	5	4	2	2	2	2	4	3	1	2	3	1	1	2	1	4	2	3	3	1	3	3	2	1	2	4	2
2	21	5	4	0	2	7	4	3	3	2	1	7	3	3	3	3	1	1	3	3	3	2	2	2	3	1	1	1	1	1	4	1	3	1	4	3	3	1	3	3	2
2	19	5	1	3	1	7	1	1	2	1	1	7	3	1	2	2	2	2	3	3	2	2	2	3	3	2	2	2	3	3	3	3	4	2	4	2	2	2	4	4	2
1	21	5	1	3	1	7	1	1	3	1	1	7	2	1	5	3	1	2	5	5	4	1	3	4	1	1	3	1	1	3	4	4	5	1	5	2	1	1	5	3	1
1	21	5	4	0	2	5	3	3	4	3	2	7	2	5	2	5	1	4	3	5	4	2	1	3	3	1	4	5	5	3	3	2	4	3	4	2	2	2	4	4	2
2	20	5	4	0	1	7	2	2	3	3	2	7	3	2	4	2	3	2	3	4	2	2	3	2	2	1	1	2	4	3	4	4	4	1	3	3	4	1	4	4	2
2	21	5	4	0	3	5	1	1	4	2	2	6	3	2	4	3	3	4	4	2	4	3	3	2	4	1	1	3	3	3	4	2	4	2	4	3	2	1	4	4	2
2	19	5	4	0	2	6	1	3	4	2	1	5	5	3	5	3	2	2	3	3	5	3	2	3	2	1	3	3	2	2	4	2	4	2	4	3	4	1	3	4	3
2	19	5	4	0	1	6	2	7	1	2	2	7	1	1	3	4	1	1	3	4	2	2	1	4	1	1	2	2	3	3	4	3	2	1	5	4	4	1	4	4	1
1	47	3	4	0	1	7	6	2	2	2	2	4	2	2	5	4	1	1	4	2	4	1	1	2	1	1	1	1	4	1	1	1	5	1	5	1	3	1	1	4	1
2	18	6	4	0	3	7	1	2	2	2	3	7	2	4	4	2	1	1	3	4	2	2	1	4	2	1	2	3	2	1	4	2	3	2	5	2	4	1	4	4	1
2	18	5	4	0	1	4	6	4	6	1	2	5	6	6	4	2	4	3	1	2	5	2	1	2	1	4	4	4	4	1	5	4	5	2	5	5	2	4	4	4	4
2	22	5	4	0	1	7	2	3	3	3	3	7	2	3	3	2	1	2	2	4	2	3	1	4	2	1	2	2	2	1	4	1	4	2	5	2	4	1	4	4	2
1	26	7	4	0	1	7	3	3	7	3	2	7	3	2	3	3	2	1	1	1	2	2	1	1	2	3	1	3	4	1	3	3	2	2	2	1	4	3	2	2	2
1	20	5	4	0	3	7	2	3	3	3	2	7	5	3	2	3	1	4	3	2	3	3	2	2	2	1	1	1	3	2	2	3	3	2	3	1	2	3	3	2	1
2	19	5	4	0	2	7	2	2	3	2	1	7	3	1	3	3	1	1	3	2	5	1	1	3	3	1	1	1	2	1	2	1	5	4	5	1	3	1	5	3	1
2	22	5	4	0	2	7	1	6	2	3	2	7	3	4	3	3	2	2	3	2	3	1	1	1	2	1	1	1	1	1	1	1	1	1	1	1	2	1	3	3	1
1	22	5	4	0	1	3	7	4	3	3	2	3	5	5	4	3	3	2	3	2	3	3	3	2	1	1	2	2	4	3	2	3	4	2	2	3	2	4	4	2	2
2	18	3	4	0	6	6	3	5	5	4	1	6	4	5	4	2	3	4	3	3	3	3	3	3	3	2	2	3	4	2	4	3	4	2	5	4	4	2	4	3	2
2	27	7	4	0	2	7	1	4	4	1	2	7	5	1	4	3	1	1	2	4	4	1	1	4	3	1	1	2	2	2	4	2	4	1	5	3	4	1	3	3	1
2	40	7	4	0	1	5	1	5	4	2	2	7	2	2	4	4	2	2	2	5	2	2	1	1	3	1	1	1	1	1	3	1	3	1	5	3	4	1	3	3	1
2	27	4	4	0	2	3	1	2	2	2	3	7	2	1	4	3	1	4	2	3	3	1	1	2	3	3	1	2	4	1	4	3	4	4	1	3	1	1	4	4	3
2	21	5	4	0	1	6	3	2	7	2	1	3	1	5	4	3	1	2	2	4	2	2	1	2	2	1	1	1	2	1	4	3	4	1	1	1	1	1	4	2	2
1	19	5	4	0	1	5	2	3	3	2	2	7	2	2	5	2	3	1	4	4	1	1	1	4	1	1	1	1	1	4	5	1	5	1	5	1	2	2	4	4	1
2	20	5	4	0	1	4	1	2	4	2	2	7	2	3	5	5	1	1	1	4	5	1	1	4	1	1	1	1	2	1	5	2	5	1	5	4	1	1	4	5	5
1	20	5	4	0	2	6	2	2	4	2	2	4	4	3	4	3	2	2	3	2	5	2	2	3	2	1	2	2	2	4	3	3	4	1	2	3	3	2	2	4	3
2	19	5	4	0	1	6	2	2	4	2	2	5	2	3	3	3	2	1	2	3	2	3	1	2	1	1	1	1	3	1	3	3	5	1	5	1	4	1	2	3	1
1	22	5	4	0	1	7	1	4	3	3	2	5	2	3	2	5	1	4	3	3	4	4	3	4	2	2	4	3	4	3	5	3	4	3	2	4	2	1	4	4	3
2	20	5	4	0	2	6	2	5	6	1	1	6	4	5	3	4	2	2	3	4	2	1	1	2	2	3	1	1	3	4	4	2	5	1	4	3	4	2	4	5	2
1	56	3	4	0	2	5	2	6	5	2	3	6	6	4	3	3	2	1	3	5	2	1	2	2	2	1	1	1	1	3	4	3	4	2	5	2	4	1	4	4	1
1	23	5	4	0	1	6	1	2	3	2	2	3	2	3	4	3	2	1	3	5	1	2	1	1	2	1	1	1	1	2	4	4	5	1	4	4	3	1	4	4	1
2	20	5	4	0	2	7	3	3	2	2	5	7	2	5	4	3	1	1	3	3	3	2	1	3	2	4	2	1	2	1	3	1	4	1	4	2	3	2	4	3	2
2	22	4	4	0	2	5	4	3	5	1	3	6	4	3	5	4	1	1	2	3	3	3	1	1	4	1	1	1	1	1	3	2	4	2	5	1	2	1	4	5	1
1	34	5	4	0	1	3	2	3	3	2	2	4	3	4	3	3	2	1	2	2	2	2	1	4	2	1	1	4	3	1	5	4	4	2	4	3	3	3	3	4	3
1	36	7	4	0	3	7	1	4	6	2	2	7	1	4	5	4	3	3	3	3	3	3	4	4	4	2	2	3	4	4	4	2	5	1	2	3	4	2	4	4	2
1	54	3	4	0	1	7	2	3	3	3	3	6	3	3	4	2	1	1	5	3	3	1	1	3	3	1	1	1	3	1	4	3	4	1	2	1	3	1	3	3	1
1	19	5	4	0	1	2	1	3	4	2	1	4	2	2	4	3	3	2	2	2	1	3	2	2	3	2	1	1	2	1	3	2	4	2	2	2	2	2	3	3	1
1	43	7	4	0	1	2	2	3	4	3	2	3	3	3	4	3	2	2	3	3	3	1	2	3	3	1	2	2	3	3	4	2	4	2	4	1	3	1	4	4	1
2	21	5	1	1	4	7	1	1	2	1	1	7	4	1	3	2	1	1	2	4	4	2	1	5	4	1	1	1	1	1	4	1	4	3	5	3	3	1	2	5	4
2	47	4	4	0	3	7	3	3	3	2	2	7	3	3	4	3	2	2	2	1	4	3	2	3	2	1	2	3	2	2	3	1	5	2	4	3	4	1	3	4	1
2	26	5	4	0	1	6	2	2	4	1	2	5	2	3	3	3	2	2	4	3	3	3	2	3	4	2	2	2	2	2	3	2	3	2	4	2	4	2	2	4	2
1	21	5	4	0	3	3	4	2	3	2	2	3	2	3	2	2	2	3	4	4	3	2	2	4	2	2	4	3	2	3	2	2	3	2	5	3	5	2	3	4	3
2	42	7	4	0	3	7	3	6	6	2	2	7	2	2	5	2	2	1	4	4	4	2	3	3	4	1	1	2	2	1	4	2	4	1	2	3	3	1	4	4	1
1	30	7	4	0	2	6	2	5	2	2	2	5	2	2	3	4	1	2	1	2	1	1	1	2	3	1	2	2	3	2	3	2	4	3	5	1	1	4	3	4	1
1	43	4	4	0	1	3	2	3	4	2	2	7	4	5	4	2	2	2	4	4	3	3	3	3	3	3	3	3	3	3	3	3	3	3	5	3	3	5	3	3	3
2	21	5	4	0	1	6	1	2	1	2	1	7	2	4	4	2	1	1	4	3	3	2	1	4	3	1	3	2	3	2	4	3	5	2	5	3	4	3	4	4	2
1	59	2	4	0	1	5	3	3	5	3	2	5	5	4	2	1	4	2	3	2	2	2	4	2	2	3	2	2	3	2	4	4	4	2	2	4	2	4	2	4	2
1	31	3	4	0	1	4	2	2	3	2	2	2	2	2	2	3	2	1	2	3	2	2	1	1	2	2	1	3	3	1	4	3	2	4	2	1	1	3	4	2	2
2	19	5	4	0	2	6	2	2	4	2	1	7	3	3	4	3	1	1	2	4	4	3	3	2	4	1	1	1	2	1	3	4	4	1	5	3	4	1	4	3	2
1	20	5	4	0	2	6	3	6	6	5	3	6	5	5	3	2	2	2	2	2	4	2	2	2	2	1	2	2	4	2	3	2	4	2	4	2	3	2	4	4	2
2	28	4	4	0	1	6	2	4	2	1	1	6	2	2	4	2	1	3	4	4	4	4	1	2	3	2	3	3	2	3	4	3	4	1	2	2	4	2	4	3	1
2	19	5	4	0	4	6	5	3	4	2	2	7	4	4	3	2	1	1	2	2	2	3	1	2	2	1	1	1	1	1	3	1	4	1	5	1	2	1	2	3	1
2	81	7	4	0	7	7	3	3	2	3	2	6	6	3	3	2	1	1	4	5	5	1	1	3	4	1	1	1	1	1	4	1	4	3	5	3	5	1	4	5	4
2	55	7	4	0	7	7	2	4	2	2	2	7	2	2	3	2	2	2	3	4	3	2	1	4	2	1	1	2	2	1	3	1	3	1	2	1	2	1	3	3	2
2	22	5	4	0	1	5	2	3	4	2	1	7	4	3	5	4	3	2	3	4	4	3	3	1	4	2	4	3	2	3	4	3	4	2	4	3	3	2	4	4	4
2	20	5	2	3	3	4	1	3	3	1	1	4	3	1	4	2	2	2	3	3	3	3	2	4	1	2	2	2	1	1	4	2	2	1	2	3	4	1	3	4	1
2	19	5	4	0	2	5	3	3	5	2	1	4	3	3	4	3	2	2	3	4	2	2	1	3	1	1	2	2	2	1	3	2	4	1	5	3	4	2	2	4	1
1	21	5	4	0	4	7	3	4	5	3	1	6	4	6	4	4	2	2	3	3	4	2	1	4	2	1	3	3	2	1	3	2	4	1	1	3	3	2	3	4	2
1	60	3	4	0	7	3	2	5	4	2	3	5	4	3	5	3	3	3	3	3	3	3	3	3	3	3	3	3	3	3	3	3	5	3	4	3	1	1	4	3	3
1	35	6	4	0	2	2	2	3	4	2	2	3	4	3	3	2	1	1	1	3	4	3	1	3	2	1	2	4	2	2	1	4	3	1	3	2	1	2	5	2	2
1	21	5	4	0	4	4	4	2	3	2	2	4	3	2	4	4	3	3	2	2	5	3	1	2	3	1	1	3	4	2	4	4	5	3	2	1	2	1	3	4	4
2	22	5	4	0	4	7	1	2	4	1	3	4	2	2	2	1	1	1	5	4	3	2	1	2	2	1	1	2	1	1	4	1	4	2	2	3	2	1	2	4	2
2	19	5	4	0	1	3	1	2	4	3	1	3	2	2	4	2	1	1	2	4	3	2	1	3	2	1	1	3	1	1	5	1	5	2	5	4	4	1	4	4	2
1	61	5	4	0	1	2	3	1	4	3	2	5	5	3	5	4	3	3	3	3	4	2	2	2	4	1	2	2	2	4	4	2	5	3	1	2	2	5	4	4	5
2	25	7	1	1	1	7	1	1	1	1	1	3	1	1	4	1	1	1	4	4	1	2	3	4	3	3	1	1	3	3	4	1	3	1	5	4	2	1	3	4	3
2	18	5	4	0	1	5	2	3	4	1	1	6	5	5	2	2	1	4	5	5	1	1	1	1	1	1	1	1	4	1	5	1	4	1	5	1	3	1	1	2	1
1	29	7	4	0	2	7	2	5	4	2	2	7	3	2	4	3	1	3	3	4	4	2	1	2	3	1	2	2	4	4	2	3	3	2	5	3	2	1	4	4	2
2	19	5	4	0	3	7	2	2	4	2	1	7	2	4	3	1	1	2	3	3	3	2	1	2	2	1	1	1	2	3	4	2	4	2	5	3	2	1	3	4	1
2	60	3	4	0	1	7	2	3	2	2	2	5	3	2	4	2	2	1	4	5	4	2	1	2	2	1	1	1	1	1	2	2	2	3	5	2	4	1	4	4	1
1	23	4	4	0	7	4	2	2	3	2	2	4	2	3	4	3	1	1	4	5	4	2	1	4	3	1	3	3	4	3	3	3	4	1	4	3	4	1	4	4	3
2	32	6	4	0	3	5	3	3	4	2	2	5	4	3	4	3	1	1	5	5	4	2	1	5	1	1	1	1	1	1	4	1	4	1	5	3	4	1	4	5	2
2	23	7	4	0	1	4	4	2	3	1	2	6	7	5	1	4	1	1	3	5	5	3	3	2	3	1	1	1	4	1	4	4	4	1	5	2	2	1	2	5	1
2	19	5	1	3	1	7	1	1	2	1	1	7	2	1	3	1	1	1	3	3	2	2	1	4	3	1	1	2	1	1	2	1	4	1	1	1	3	2	4	4	1
2	54	7	4	0	2	7	2	2	2	2	2	7	4	2	4	4	1	1	5	5	3	1	1	3	1	1	1	1	1	4	3	1	5	1	3	3	3	1	3	3	1
1	21	5	4	0	6	6	2	2	4	2	2	6	3	2	2	3	2	3	1	2	2	2	2	2	2	1	3	3	4	4	3	3	4	4	4	4	3	4	4	5	1
1	52	7	4	0	7	7	3	3	3	2	3	7	4	2	5	4	2	1	2	4	5	1	1	2	2	1	1	2	2	1	2	1	4	2	5	3	2	1	4	4	1
2	53	2	4	0	1	7	3	4	3	3	2	6	6	2	5	1	1	1	5	5	5	1	1	1	1	1	1	1	1	1	1	1	3	3	1	3	3	1	1	1	1
2	20	5	4	0	7	7	3	2	5	2	2	6	3	2	4	2	4	1	5	5	5	4	4	5	2	1	4	3	4	3	4	4	4	1	5	4	5	3	4	4	1
1	51	3	4	0	1	6	4	3	2	2	2	2	2	2	4	3	5	4	4	3	5	2	4	2	1	1	4	2	3	3	4	3	5	1	5	4	4	4	4	4	5
1	34	7	4	0	1	6	3	3	3	3	2	3	3	3	5	4	3	2	4	4	5	2	3	3	3	1	3	2	1	3	4	3	4	1	2	3	3	1	4	4	1
2	27	4	4	0	2	4	1	2	2	1	1	6	2	2	5	3	1	1	3	5	3	2	1	3	2	1	2	1	4	3	4	3	4	1	4	2	4	1	3	4	2
2	51	5	4	0	2	5	2	3	3	2	1	6	3	1	4	4	2	1	4	4	1	1	1	4	2	1	1	1	1	1	4	1	4	1	4	3	4	1	4	4	1
1	28	7	4	0	1	5	1	3	3	2	2	6	2	3	3	4	2	4	5	4	4	2	3	2	2	2	3	3	4	4	3	3	2	1	5	3	4	1	4	4	3
2	31	7	4	0	2	5	3	3	4	3	2	6	3	3	2	4	2	3	2	4	4	1	1	2	2	2	1	1	2	1	4	2	2	2	4	2	4	1	4	5	2
2	23	4	4	0	2	7	2	4	4	2	2	7	3	2	4	4	4	3	2	3	4	2	2	2	2	2	2	4	1	1	4	2	4	1	4	3	3	2	4	4	2
1	28	7	4	0	2	7	5	2	3	2	2	3	2	3	4	3	1	1	4	3	4	1	1	3	2	3	1	2	1	1	3	1	4	2	5	3	4	2	2	2	3
1	22	7	4	0	1	7	3	2	4	2	2	6	2	4	3	3	1	1	4	4	4	3	1	4	2	1	1	2	2	3	4	2	4	1	5	3	2	1	4	4	3
1	70	1	4	0	1	3	2	3	4	4	4	4	4	2	4	1	2	1	2	4	3	1	2	2	1	2	2	1	2	2	4	2	1	1	2	2	4	2	4	3	2
1	23	5	4	0	3	6	2	3	3	3	2	5	5	4	4	4	2	2	3	3	3	2	1	3	3	2	2	3	2	1	4	2	4	3	5	3	2	4	3	5	2
2	27	7	4	0	1	3	1	2	1	2	4	7	6	2	3	3	3	4	2	3	3	3	3	3	3	3	2	3	2	3	3	2	4	3	4	3	3	2	5	2	2
2	55	7	4	0	1	5	3	4	4	2	3	7	4	2	2	3	1	1	4	3	2	2	1	2	3	2	1	2	2	3	3	2	3	1	2	2	4	1	2	3	3
2	47	3	4	0	2	7	4	2	6	2	1	5	2	2	5	3	1	1	3	3	2	2	1	1	2	1	1	1	1	1	2	1	3	1	5	1	4	1	2	2	1
2	23	4	4	0	1	4	2	2	2	1	2	7	4	3	5	4	3	2	3	4	2	1	3	3	2	1	1	4	4	3	5	2	4	1	2	3	4	5	5	4	1
2	22	4	4	0	1	5	1	2	3	1	2	6	2	4	3	4	3	1	4	4	3	2	1	4	2	1	1	1	1	1	5	2	3	1	5	4	4	1	3	5	1
1	22	3	4	0	1	3	7	4	6	3	2	6	6	5	4	1	1	2	3	1	4	2	1	3	1	1	2	2	2	1	3	1	3	1	1	3	4	3	4	3	2
2	59	6	4	0	1	7	2	4	4	1	2	7	5	3	3	3	2	2	4	4	3	2	2	3	2	1	3	3	3	3	4	3	4	2	3	3	4	2	4	4	2
2	31	7	4	0	2	7	1	3	3	2	2	7	5	2	5	4	1	1	3	5	3	2	2	1	2	1	1	2	1	1	4	2	3	2	5	3	2	1	2	4	1
2	18	5	4	0	2	3	3	2	2	1	1	4	4	4	4	3	2	4	2	4	3	4	1	1	4	3	3	3	4	1	4	3	4	3	4	3	2	1	4	4	3
2	18	5	4	0	2	7	1	4	1	1	1	7	2	2	3	3	1	1	2	5	3	1	1	4	3	1	1	1	1	1	4	1	3	2	5	1	3	3	2	4	1
2	48	5	4	0	3	7	2	3	3	2	2	5	5	2	3	4	1	1	4	4	3	2	2	2	4	1	1	3	3	1	3	1	3	1	3	3	3	1	3	4	2
2	20	5	4	0	2	7	3	3	2	2	2	6	1	4	4	4	4	3	2	1	3	4	4	1	2	2	3	2	4	4	2	4	5	1	5	2	2	1	4	5	4
2	31	5	4	0	6	7	1	3	2	2	2	7	3	1	2	4	2	3	2	4	4	3	1	4	3	1	3	2	4	2	4	3	4	2	2	4	2	2	4	4	4
1	28	7	4	0	1	7	3	2	3	3	2	5	3	3	2	4	1	1	3	3	3	2	1	2	3	1	1	2	1	1	3	1	3	3	4	2	3	2	2	2	2
2	29	7	2	3	1	7	1	2	3	1	1	7	2	1	3	2	1	1	4	4	4	2	1	3	1	1	1	2	1	1	5	1	2	1	5	1	4	1	3	4	1
2	46	3	4	0	2	7	3	3	3	2	3	7	3	2	5	3	3	2	3	4	3	2	2	1	2	2	1	1	2	2	5	3	4	3	5	3	3	1	4	4	3
1	48	7	4	0	3	6	4	3	4	2	2	4	4	2	3	2	2	3	2	3	4	3	2	4	3	2	4	4	3	4	4	3	3	2	2	3	2	2	4	4	2
2	25	7	4	0	1	7	1	3	2	1	2	7	3	4	4	4	1	1	4	4	5	3	1	4	1	1	1	4	2	1	4	3	4	1	2	1	2	2	4	4	3
2	47	3	2	3	2	2	1	2	5	1	1	7	6	1	5	1	2	1	5	4	2	1	4	2	2	2	4	2	4	4	4	3	4	1	2	2	5	1	5	4	1
2	46	3	4	0	2	7	2	3	2	3	2	6	6	3	4	3	3	2	4	4	4	3	2	4	2	1	3	3	2	2	4	2	4	2	2	3	4	2	2	4	2
2	24	7	4	0	1	4	2	2	4	1	1	4	5	4	5	1	1	1	4	3	3	3	2	4	3	1	1	1	2	1	5	1	4	1	5	5	5	4	4	4	1
1	24	5	4	0	2	4	3	1	4	2	3	7	5	5	4	4	3	3	3	4	3	2	1	4	4	2	1	2	2	1	2	3	3	4	2	1	2	3	3	3	1
2	23	5	2	2	7	7	1	2	4	1	1	7	4	1	4	1	1	3	4	5	4	1	1	4	1	1	2	3	4	1	5	1	3	1	2	4	4	2	3	4	3
2	26	6	4	0	1	5	3	4	4	2	1	5	2	3	4	3	1	1	3	3	2	2	1	3	2	1	1	1	1	1	4	1	4	1	4	2	4	1	1	4	2
2	21	3	4	0	2	7	2	2	3	1	2	7	1	2	4	5	1	1	2	3	4	2	1	4	1	1	1	1	1	1	4	1	5	1	5	3	5	1	4	3	2
2	52	2	4	0	5	4	3	2	4	2	2	3	3	3	4	3	3	2	2	4	3	2	3	3	3	2	2	2	2	3	4	4	4	2	4	3	2	2	3	4	2
1	19	5	4	0	1	3	3	3	4	2	1	7	1	2	4	3	1	2	2	4	2	1	1	2	2	1	1	1	4	2	4	1	5	1	5	3	2	3	4	5	2
2	19	5	4	0	2	7	2	3	4	2	2	4	4	3	3	2	2	1	3	4	4	3	1	4	4	2	2	2	2	2	4	4	4	1	5	3	4	2	3	4	3
2	46	3	4	0	2	7	2	2	2	1	1	4	3	2	2	4	1	1	2	2	5	1	1	1	1	1	1	1	1	1	4	1	4	1	5	2	4	1	4	4	4
2	83	3	4	0	7	7	3	4	2	2	3	7	7	2	4	3	2	2	4	3	3	2	1	3	3	2	2	3	2	2	4	2	3	2	4	3	2	1	3	4	3
1	24	5	4	0	1	7	3	7	3	3	3	7	2	6	4	4	2	2	2	3	3	1	1	2	2	1	3	4	1	3	1	4	4	3	1	2	2	3	3	3	1
1	46	3	4	0	4	3	3	4	3	2	2	3	3	2	4	3	2	3	2	3	4	3	2	4	3	2	4	4	3	3	3	3	4	2	5	3	3	2	3	4	3
2	21	5	4	0	1	7	2	2	6	1	1	7	4	2	2	3	2	4	2	4	2	2	2	4	2	2	4	3	4	2	3	2	4	2	4	1	2	2	4	4	2
2	20	5	4	0	3	7	3	2	2	2	2	6	4	4	4	2	1	2	5	4	2	2	1	3	2	1	1	1	1	2	4	3	4	1	5	2	4	1	4	4	1
2	20	5	2	3	1	7	1	4	2	1	1	7	2	1	4	2	1	1	5	4	2	2	1	1	3	1	1	2	2	1	5	1	4	1	5	1	4	2	4	4	2
2	54	7	4	0	1	4	1	3	3	2	2	7	7	2	5	4	1	1	1	4	4	1	1	1	1	1	1	1	1	1	1	1	4	1	1	1	1	1	1	4	1
2	18	5	4	0	1	5	1	4	5	2	2	5	2	3	5	2	1	2	4	4	4	2	1	4	2	3	2	3	2	1	4	1	4	1	2	3	2	3	2	3	2
1	31	7	4	0	7	4	2	2	4	2	1	3	2	2	2	4	1	2	3	4	3	2	1	4	2	1	1	1	1	1	4	1	4	1	4	3	4	1	4	4	2
2	19	5	2	2	5	6	1	3	2	1	1	7	5	1	3	3	1	1	4	5	4	3	1	1	5	1	3	4	3	1	4	1	4	1	5	3	4	1	4	3	4
2	19	5	4	0	3	3	2	3	5	2	2	5	3	3	4	2	1	3	2	5	4	2	2	3	2	1	2	2	3	2	4	2	3	1	5	3	4	1	4	4	2
2	66	2	4	0	3	7	2	4	2	2	2	6	5	3	4	3	1	4	5	5	3	1	1	4	2	1	1	1	1	1	4	2	3	1	2	3	4	3	1	4	2
2	24	7	4	0	7	7	3	4	4	2	4	6	5	5	2	2	2	1	2	4	1	3	1	1	2	1	1	1	3	1	3	1	3	1	4	3	4	1	1	3	1
2	20	5	4	0	3	7	1	2	2	1	1	7	4	2	3	2	1	1	3	1	1	1	1	1	3	1	1	1	1	1	4	1	2	2	5	1	3	1	3	2	2
1	46	3	4	0	2	4	2	3	4	2	1	3	4	3	4	4	3	2	4	3	3	2	2	4	3	2	2	3	2	2	4	2	4	2	2	2	4	1	4	4	2
2	54	3	4	0	2	6	4	3	5	3	2	6	2	2	3	3	2	2	2	4	2	2	2	2	3	1	1	3	1	2	4	2	3	2	4	3	2	1	4	4	2
2	22	5	4	0	2	4	3	2	4	3	2	5	2	4	2	4	2	2	3	2	5	2	1	4	2	1	2	2	2	2	4	2	3	1	4	2	3	1	2	4	1
2	26	7	4	0	2	5	1	3	4	2	1	6	4	3	3	2	1	1	3	3	5	2	1	2	3	1	1	1	3	1	4	1	3	1	4	1	3	1	3	1	2
2	21	5	4	0	4	7	3	3	3	1	2	6	4	1	3	3	2	2	3	4	5	3	2	3	2	1	4	2	2	3	4	2	4	1	5	2	4	1	3	4	3
2	24	7	4	0	2	7	2	2	4	2	2	5	1	1	3	4	1	1	1	4	2	1	1	2	2	1	1	2	3	1	4	1	1	1	5	1	3	1	3	4	2
1	68	2	4	0	1	7	4	3	3	2	2	5	4	2	5	2	1	1	3	4	4	3	1	4	2	1	2	4	2	2	3	2	4	1	3	5	4	1	4	4	3
1	20	5	4	0	1	7	2	2	5	1	1	5	2	2	3	2	1	1	3	2	4	3	1	3	2	1	2	1	2	1	4	3	1	1	3	2	1	1	2	4	4
2	19	5	2	3	1	5	1	2	3	1	1	4	2	1	4	2	1	2	4	4	5	2	1	4	2	1	1	1	1	1	4	1	4	1	4	3	4	1	2	3	1
2	52	7	4	0	6	7	4	3	4	3	3	6	5	4	3	4	2	3	2	4	3	2	2	1	3	1	1	1	1	1	3	1	2	1	5	1	3	1	3	3	1
2	54	7	4	0	2	7	4	4	4	2	1	7	4	2	4	3	4	3	3	3	4	3	3	2	3	1	3	2	4	3	4	3	4	1	5	1	4	1	4	5	2
2	21	5	2	3	1	6	1	2	3	1	1	5	4	1	2	2	3	1	1	1	1	1	1	1	2	1	1	1	3	1	1	1	1	2	1	1	1	1	1	4	1
1	55	2	4	0	1	2	6	2	3	3	2	3	2	3	5	2	2	2	4	4	3	2	2	2	2	2	2	2	2	2	2	2	4	2	2	4	2	4	4	3	1
2	50	3	4	0	1	6	5	3	3	2	1	7	3	2	4	3	1	1	4	4	3	2	1	3	1	1	1	1	2	1	4	1	4	1	5	3	2	1	3	4	2
1	59	7	4	0	2	4	4	3	2	4	3	5	4	2	3	3	1	1	2	4	3	3	1	2	2	1	1	1	2	1	4	3	3	2	4	3	3	2	4	3	1
2	20	5	4	0	6	6	5	3	6	3	1	7	3	1	4	4	3	3	2	3	2	2	2	4	2	1	2	1	5	3	5	3	4	2	5	2	1	1	4	4	1
2	23	5	2	3	1	7	1	2	2	1	1	7	6	1	3	2	1	1	4	5	3	2	1	1	2	2	1	1	1	1	4	2	4	1	5	3	3	1	1	3	1
2	63	7	4	0	1	7	3	4	4	2	2	6	4	2	4	2	1	1	4	4	3	3	1	3	3	1	1	2	1	1	3	1	4	3	4	3	4	2	2	4	1
2	25	7	4	0	1	6	6	4	5	3	2	6	3	2	4	3	2	1	2	4	3	2	2	4	4	1	2	2	2	4	4	2	5	1	5	2	2	1	4	4	1
2	52	3	4	0	2	5	2	5	3	2	3	5	3	2	3	2	1	1	2	3	1	1	1	1	1	1	1	1	1	1	1	1	3	1	1	1	3	1	2	2	1
2	23	7	4	0	2	5	2	3	3	2	2	7	4	2	4	5	1	1	4	4	4	3	1	1	3	1	1	3	4	1	3	1	4	1	1	1	3	1	3	4	1
2	19	5	4	0	1	5	2	2	5	1	1	3	2	3	4	3	1	1	4	4	3	3	1	3	3	1	1	2	2	1	4	3	4	2	5	3	4	2	3	4	2
1	21	5	4	0	1	3	2	1	4	2	2	3	4	1	3	3	1	3	2	4	4	3	1	3	4	1	1	1	3	1	3	2	2	1	5	1	3	1	4	2	1
1	47	2	4	0	1	1	6	2	3	4	2	4	4	2	4	3	4	4	3	5	5	3	2	2	2	1	4	4	4	4	4	3	4	4	2	4	4	3	4	4	4
2	19	3	4	0	2	7	2	2	4	3	1	7	2	2	2	3	1	1	2	5	1	3	1	1	1	1	1	1	1	1	4	1	4	1	2	1	4	1	1	5	1
2	20	5	4	0	4	6	2	3	2	2	2	4	2	3	3	3	1	1	3	4	3	3	1	1	3	1	2	1	1	3	5	1	4	1	5	4	3	1	3	5	1
1	19	5	4	0	1	3	2	3	3	2	2	3	4	3	4	3	3	3	3	2	3	3	3	4	3	3	4	3	4	4	3	4	5	3	3	3	3	3	3	3	3
2	23	5	4	0	1	7	2	2	2	2	2	7	2	2	2	3	2	1	2	4	2	2	2	2	2	1	1	1	2	1	4	2	3	2	5	1	4	2	4	2	2
2	21	5	4	0	1	4	4	6	6	1	1	6	6	1	3	2	1	1	4	3	2	1	1	5	2	1	1	1	2	1	4	1	4	2	5	2	4	1	4	4	1
2	21	3	4	0	2	3	2	4	4	2	2	3	4	2	4	3	1	1	3	4	5	3	1	1	3	1	1	1	1	1	4	1	2	1	5	4	4	1	2	3	1
1	19	5	4	0	2	7	2	3	3	3	3	6	3	3	3	2	2	2	4	3	3	4	1	3	1	1	1	1	4	3	1	3	3	1	5	3	4	3	5	4	2
1	63	7	4	0	3	2	4	4	2	2	2	3	3	3	5	4	1	1	4	4	2	1	1	1	1	1	1	1	1	1	1	1	4	1	4	1	1	1	4	1	1
2	21	5	2	3	1	4	1	1	2	1	1	7	4	1	3	2	2	2	4	4	2	2	2	2	1	1	1	1	1	3	4	1	4	1	1	1	4	1	1	1	1
2	50	3	4	0	4	7	2	3	2	2	2	7	3	2	4	3	1	3	3	3	1	2	1	2	4	1	1	1	3	1	4	4	4	2	5	2	3	2	5	4	2
1	46	3	4	0	3	7	3	2	3	3	2	5	2	2	5	4	4	4	3	3	4	3	2	4	4	4	4	2	2	2	3	3	4	3	2	3	2	4	4	4	2
2	20	5	1	3	1	7	1	1	2	1	1	7	4	1	4	2	2	2	4	4	3	2	2	4	1	2	3	2	2	3	4	2	3	1	5	3	4	1	4	3	2
2	23	5	2	3	2	6	1	1	3	1	1	6	2	1	2	1	3	1	3	4	2	2	1	3	3	2	1	1	1	1	4	2	4	1	5	1	4	1	1	4	1
2	26	3	4	0	1	3	2	2	3	2	2	3	3	3	3	2	2	2	3	4	2	2	2	2	2	2	2	2	2	2	4	2	3	2	4	2	4	2	4	4	2
2	20	5	4	0	6	7	3	4	6	2	1	6	6	4	5	2	1	1	3	4	2	3	2	3	1	4	1	2	4	2	5	1	5	1	5	1	4	4	4	2	1
2	18	5	4	0	1	5	3	3	4	3	1	4	5	5	4	3	2	2	3	4	3	3	2	2	3	2	2	3	2	2	4	3	4	2	5	4	4	2	3	4	3
2	20	5	1	3	1	7	1	1	4	1	1	7	5	1	4	2	2	2	4	4	4	1	1	1	2	1	1	2	1	1	4	1	3	1	5	1	4	1	1	3	2
2	50	3	4	0	1	7	5	3	3	1	2	4	3	2	5	4	2	1	3	4	3	2	2	3	2	1	1	1	3	2	4	2	4	1	5	2	4	1	4	4	1
2	22	5	4	0	1	5	2	7	4	1	3	4	3	5	4	3	1	1	4	2	4	2	2	2	2	2	2	2	3	1	4	2	4	2	2	3	4	1	4	4	2
1	74	4	4	0	6	5	3	2	3	2	2	4	5	2	3	2	1	1	3	3	4	2	1	2	1	2	3	3	1	2	2	1	1	1	4	3	3	1	2	4	2
2	19	5	4	0	2	4	3	2	5	3	2	6	3	3	4	3	2	2	3	4	3	2	1	3	3	1	2	1	2	2	3	3	2	2	1	4	4	3	3	5	3
1	21	3	4	0	4	4	4	4	4	3	1	4	3	4	5	2	1	1	3	2	2	1	1	2	1	1	5	1	3	4	3	3	4	1	2	3	3	1	4	1	2
2	20	5	4	0	1	3	2	4	5	1	1	5	2	1	3	3	1	1	3	4	4	3	1	3	4	1	1	2	1	1	4	2	4	2	4	2	3	1	3	4	2
1	22	5	4	0	1	7	1	2	1	1	2	4	3	5	5	2	4	2	2	4	4	4	2	5	5	2	5	3	3	4	4	4	5	3	5	2	2	1	5	4	1
2	21	5	4	0	1	4	1	2	4	1	2	5	2	3	5	3	1	1	2	3	3	3	1	4	3	1	2	3	1	1	4	3	2	2	4	2	2	3	3	4	1
1	21	5	4	0	1	6	4	7	2	4	2	6	3	5	4	2	2	2	3	3	4	3	2	4	2	2	2	2	2	3	4	2	4	2	2	2	4	2	3	4	3
2	36	2	4	0	1	6	1	2	3	3	2	7	1	1	4	3	2	3	4	3	3	3	1	2	3	1	2	2	1	1	4	3	2	4	2	2	4	1	3	4	3
2	28	5	2	3	5	7	1	2	3	1	1	7	2	1	2	3	1	1	4	4	2	2	1	3	1	1	1	1	1	1	4	1	2	1	5	3	4	2	3	4	2
1	24	5	4	0	1	3	3	6	4	3	2	4	2	4	3	2	1	1	4	3	3	2	3	2	3	1	2	3	2	3	3	3	4	2	4	2	2	3	4	4	4
2	52	4	4	0	3	4	4	2	4	4	2	5	4	3	4	3	1	1	4	4	4	2	1	4	4	1	1	1	1	1	4	1	4	1	2	2	3	1	2	2	1
2	24	5	4	0	2	2	2	3	4	2	2	4	2	2	4	3	2	1	3	2	3	2	2	3	3	1	1	4	1	1	3	1	4	1	2	1	2	2	3	5	3
2	28	7	4	0	1	5	1	4	3	2	1	7	2	1	2	1	2	3	5	4	4	1	1	1	2	1	2	1	3	1	4	1	3	1	5	3	4	1	4	4	1
2	19	5	4	0	1	7	2	2	2	1	2	6	2	2	4	1	2	1	4	3	4	1	1	4	1	1	3	3	4	3	4	1	5	1	2	2	4	1	4	3	2
2	18	6	2	3	1	6	1	2	1	1	1	7	3	1	3	2	4	2	5	3	2	2	1	1	3	2	1	1	1	4	5	4	4	1	5	2	1	1	5	4	1
2	50	5	4	0	5	6	4	6	3	3	2	5	2	4	4	4	1	1	1	3	3	2	1	1	1	1	1	1	4	1	4	2	5	1	5	1	3	1	3	4	1
2	46	5	4	0	6	7	2	4	2	2	2	6	2	2	4	3	1	1	2	4	3	1	1	2	4	1	1	4	1	1	3	2	2	2	5	3	4	1	3	4	3
1	24	7	4	1	2	5	3	3	3	1	2	4	3	1	4	2	3	2	3	4	4	2	3	3	2	1	1	1	2	1	3	1	1	1	5	3	2	2	4	4	1
1	27	3	4	0	3	6	3	4	4	2	2	5	4	2	4	2	2	2	4	3	4	3	1	2	3	1	1	1	1	2	4	2	4	1	5	3	4	2	3	4	2
2	58	6	4	0	1	7	3	5	4	2	2	5	4	2	4	2	1	1	3	4	3	3	1	3	1	1	1	1	1	1	3	2	2	2	4	3	3	2	3	1	1
1	45	4	4	0	2	6	3	3	2	2	1	5	3	2	4	2	3	3	4	4	4	3	2	4	3	2	4	4	4	4	4	4	4	2	4	4	4	2	4	4	2
2	26	5	4	0	4	6	1	6	1	2	3	7	3	2	3	3	2	4	2	3	4	2	1	4	4	2	2	2	2	2	4	3	4	2	1	4	4	4	4	4	2
2	19	5	4	0	2	3	7	4	4	4	3	7	6	4	2	2	2	3	2	2	3	2	3	1	2	3	1	2	3	1	5	3	4	1	2	2	3	1	4	4	2
2	51	7	4	0	1	7	2	2	3	1	4	6	4	2	5	3	1	1	4	4	4	2	1	2	2	1	2	2	1	1	4	2	4	2	2	2	4	1	3	4	2
1	46	5	4	0	2	2	3	3	2	3	2	2	2	2	5	3	3	1	2	2	2	1	1	2	3	1	1	1	2	1	1	3	5	1	4	3	4	2	4	3	1
2	48	3	2	3	1	7	1	2	5	1	1	5	4	1	4	3	1	1	4	3	3	3	1	2	3	1	1	1	1	1	4	1	4	1	2	1	4	1	3	4	2
2	30	3	4	0	1	5	2	1	5	2	2	5	5	2	4	1	2	2	5	3	5	2	3	2	2	2	3	1	4	3	4	3	4	1	2	3	3	2	3	4	2
2	46	7	4	0	4	7	1	3	3	3	2	7	4	2	3	2	1	1	5	4	3	2	2	3	2	1	2	1	3	3	4	1	2	1	5	4	4	1	3	3	3
2	47	3	4	0	7	7	2	2	3	1	2	6	5	4	4	2	1	1	4	4	3	1	1	2	2	1	1	1	1	1	4	1	4	1	5	1	4	1	1	1	1
2	33	7	4	0	1	3	3	3	5	2	1	7	3	2	2	4	1	2	1	4	2	2	1	3	3	1	1	2	2	1	3	2	2	2	5	2	2	1	4	4	2
2	27	3	4	0	2	7	4	3	2	4	2	7	2	2	2	4	1	1	4	4	2	3	1	5	3	2	1	2	2	1	5	1	4	1	4	2	5	4	4	3	1
2	18	5	2	3	1	6	1	4	2	1	1	5	2	1	4	1	1	1	5	5	3	1	1	3	2	1	1	1	2	1	5	1	4	1	5	3	4	1	4	3	2
2	21	5	4	0	1	7	2	3	4	2	2	6	3	2	2	3	1	1	2	2	3	3	1	2	3	1	2	2	1	1	5	1	2	1	5	3	4	1	3	4	1
2	23	5	4	0	2	7	1	3	4	2	1	6	2	2	4	3	1	1	4	4	2	3	1	2	3	1	2	3	1	3	4	3	4	2	5	4	4	1	4	5	1
1	54	7	4	0	2	7	3	3	7	3	3	6	3	3	4	4	2	4	2	3	4	2	3	3	2	1	1	2	4	2	5	5	4	1	2	2	2	4	4	4	4
2	23	5	4	0	2	7	2	5	4	1	3	7	4	2	4	3	1	1	2	4	5	3	1	4	3	1	2	2	2	2	4	2	4	1	5	3	4	2	3	4	2
1	18	5	4	0	2	2	3	3	3	2	1	3	5	2	4	3	2	2	2	5	2	2	2	3	1	1	3	2	1	1	2	2	4	1	3	2	1	2	2	2	2
2	27	3	2	2	1	5	1	2	3	1	1	3	2	1	4	4	4	1	4	4	4	2	1	2	2	1	1	1	2	1	4	3	4	1	5	2	4	1	4	4	1
1	20	5	4	0	4	6	2	4	5	2	2	7	3	2	4	4	2	1	2	4	5	3	1	2	4	2	2	4	4	2	4	4	4	2	4	4	2	1	5	3	2
2	18	5	4	0	7	7	2	3	2	2	2	7	2	1	3	4	2	2	3	4	4	2	1	1	2	1	1	1	3	1	5	1	4	1	5	2	3	1	4	4	1
2	19	5	2	3	1	7	1	3	4	1	1	7	3	1	2	2	1	1	2	2	2	2	2	3	3	1	1	1	1	1	4	1	4	1	5	2	4	3	3	3	2
1	21	5	4	0	1	2	3	5	2	2	2	4	4	2	3	3	3	2	1	3	5	3	4	4	3	2	2	3	1	2	2	3	5	2	1	3	4	3	4	3	3
2	33	3	4	0	1	4	1	3	4	3	1	3	3	2	4	4	2	2	2	4	2	2	1	4	3	2	1	1	2	2	3	2	4	1	4	2	3	1	3	5	1
2	50	7	4	0	2	6	3	4	5	2	1	4	4	2	4	4	3	1	1	5	3	2	1	2	4	1	1	1	1	1	2	3	1	1	4	3	2	1	3	4	1
2	20	5	1	3	1	7	1	1	3	1	1	7	4	1	2	3	1	1	3	4	1	1	1	1	3	1	1	1	1	1	4	1	1	1	5	1	4	2	1	3	1
2	51	7	4	0	2	7	2	2	2	2	2	7	5	2	5	4	1	1	3	5	3	1	1	4	1	1	1	1	1	1	4	3	2	1	5	3	3	1	4	4	1
2	21	5	4	0	1	6	1	4	4	3	2	7	3	5	5	2	1	2	3	4	2	1	1	3	1	1	2	2	3	3	4	3	5	1	5	3	4	1	3	4	2
2	22	5	4	0	2	3	5	2	6	1	1	2	3	4	4	1	1	1	4	4	3	3	3	4	2	1	1	3	4	3	4	3	4	1	5	3	4	2	3	4	2
2	20	5	2	3	3	7	1	2	2	1	1	7	2	1	4	4	1	1	1	4	4	1	1	1	2	1	1	2	2	1	4	1	2	1	5	1	1	1	2	4	1
1	21	5	4	0	5	7	1	4	3	1	1	7	4	2	2	3	4	1	3	5	3	1	1	2	3	1	1	1	1	2	4	1	4	1	2	3	2	1	2	4	2
2	19	5	4	0	1	5	1	3	3	2	2	5	3	5	4	3	2	3	3	4	4	3	3	4	3	3	4	2	2	2	5	4	4	2	2	3	4	2	4	4	3
2	45	3	4	0	2	5	1	2	3	2	2	5	2	2	4	3	2	2	4	4	4	2	2	2	2	2	2	2	2	2	3	2	4	2	4	4	4	2	2	4	2
2	46	3	4	0	1	4	5	5	5	2	1	6	6	5	4	2	2	1	3	4	4	2	1	2	3	1	2	1	1	2	4	2	5	1	5	1	4	1	3	4	3
2	34	7	4	0	2	5	2	2	2	1	2	4	3	2	3	4	2	1	3	4	4	2	3	1	3	1	1	1	1	1	4	3	4	2	5	1	3	1	3	4	1
1	46	6	4	0	5	7	3	2	3	2	2	7	6	2	5	5	1	1	4	4	4	2	1	2	3	1	2	1	1	1	4	1	5	1	1	3	4	1	2	3	1
1	57	6	4	0	6	6	4	4	3	1	2	5	2	3	3	4	1	2	3	4	4	2	1	2	3	1	1	3	1	1	2	1	4	3	5	3	2	1	5	4	2
2	29	5	4	0	2	7	1	3	2	2	2	7	7	3	3	4	3	1	3	5	3	3	3	2	3	1	4	1	1	1	5	3	4	1	5	1	2	1	4	5	1
1	33	7	4	0	2	7	2	3	5	2	3	7	4	2	3	3	4	2	5	1	3	2	1	2	3	1	1	3	1	1	4	1	5	1	5	2	5	1	4	5	3
1	68	6	4	0	2	7	3	2	4	3	3	4	4	2	4	3	3	3	3	4	4	3	3	4	3	4	3	3	3	3	3	4	4	3	4	4	2	3	3	4	3
2	55	3	4	0	6	6	2	6	4	2	2	7	6	3	4	2	2	3	3	4	3	2	2	4	2	1	2	3	3	3	4	2	4	1	5	3	3	1	4	4	2
1	68	3	4	0	1	1	2	5	3	2	2	2	3	1	4	2	2	2	4	4	3	2	1	3	2	1	2	2	1	1	4	2	4	1	5	2	4	1	4	4	2
2	20	5	4	0	1	7	2	3	2	1	3	7	2	3	1	4	1	1	3	4	1	3	1	2	4	2	2	4	2	1	4	4	2	1	5	3	4	1	4	4	2
2	52	7	2	3	2	7	1	2	3	1	1	6	2	1	5	2	2	1	4	4	2	2	1	3	1	1	1	2	1	1	3	2	2	1	4	3	4	1	4	3	2
2	21	5	2	3	2	7	1	2	3	1	1	6	2	1	2	3	1	1	4	4	2	2	1	3	2	1	2	3	2	1	4	3	3	2	5	3	4	1	2	4	1
2	20	5	1	3	1	7	1	1	3	1	1	7	3	1	4	4	1	3	2	4	5	1	1	1	4	2	1	1	1	1	4	1	2	1	1	1	1	4	1	4	2
2	43	3	4	0	4	5	1	2	2	2	2	5	2	2	5	3	1	1	3	1	1	1	1	1	1	1	1	1	1	1	3	1	1	1	3	1	3	1	3	1	1
1	27	6	1	1	1	7	1	1	5	1	1	7	2	1	5	1	1	1	3	3	1	1	1	1	1	1	1	1	1	1	4	1	3	1	2	1	1	1	1	3	1
2	22	5	2	2	1	7	1	1	1	1	1	7	1	1	4	1	1	1	4	4	2	2	1	1	1	1	1	1	1	1	4	1	4	1	5	3	4	1	3	4	2
2	34	5	4	0	2	7	1	2	4	2	2	7	4	1	4	4	1	1	2	4	2	2	1	3	3	1	1	1	1	1	4	1	2	1	5	3	4	1	1	4	1
1	54	6	4	0	1	2	4	3	5	3	2	5	2	2	4	2	1	2	3	2	3	1	2	2	3	1	1	2	2	3	4	1	5	1	4	3	4	1	2	3	1
2	62	7	4	0	1	4	2	2	3	2	2	4	3	2	3	1	1	1	4	5	3	2	1	3	1	1	1	1	1	1	3	2	2	1	4	3	4	2	3	4	2
2	37	5	4	0	2	4	1	3	3	2	3	5	3	4	4	1	1	1	3	5	1	3	1	1	1	1	1	1	1	1	1	1	1	1	5	1	4	1	3	4	1
2	21	5	4	0	1	4	4	2	2	7	1	1	2	1	3	2	1	1	4	5	4	3	1	5	4	3	1	1	1	3	3	2	2	1	5	3	4	1	2	4	3
1	26	2	4	0	2	5	5	6	5	3	3	3	3	4	4	2	2	2	2	2	3	2	3	2	3	1	2	2	4	2	4	2	4	2	2	2	3	4	4	4	3
1	18	3	4	0	2	6	2	3	5	2	2	2	3	2	4	3	2	4	2	2	5	2	2	2	2	2	4	4	2	3	2	4	4	2	5	3	4	1	5	4	2
2	19	4	4	0	2	3	1	2	2	2	2	7	2	2	5	4	1	3	3	2	5	3	1	2	2	1	1	2	4	3	5	3	4	1	5	3	2	1	3	5	2
1	68	2	4	0	2	6	2	3	5	2	2	4	4	2	5	2	2	1	5	4	3	1	1	3	1	1	1	1	1	2	3	2	5	2	5	4	5	1	3	4	2
2	67	2	4	0	2	7	2	3	4	2	2	7	4	2	5	3	1	1	3	4	3	1	1	2	1	1	2	1	1	1	3	4	5	1	5	3	4	1	2	4	3
2	24	5	4	0	1	7	2	3	2	2	2	7	2	2	4	2	2	2	4	4	2	3	2	3	3	2	3	3	2	3	4	3	4	4	4	2	4	2	4	3	2
2	37	7	4	0	1	7	2	3	3	3	2	7	2	3	2	2	2	2	2	3	4	2	1	4	3	2	2	2	3	2	4	3	4	2	2	3	2	3	2	4	4
1	54	7	4	0	3	6	5	4	4	2	2	4	3	2	3	1	1	1	3	4	3	2	1	3	4	1	2	1	2	1	3	1	4	1	3	1	2	1	5	4	2
1	19	5	4	0	1	2	3	3	5	3	1	5	4	2	4	5	3	3	1	2	3	3	2	3	4	1	1	4	3	1	2	3	4	3	5	3	3	4	5	4	2
1	22	7	4	0	1	4	2	4	2	2	1	3	3	3	2	2	1	3	5	3	3	2	3	4	2	1	2	3	1	3	4	1	5	2	2	1	5	3	4	2	3
2	30	5	4	0	2	2	3	2	3	1	1	4	3	2	4	1	2	2	4	4	2	3	1	2	2	2	1	1	3	1	4	3	4	1	3	1	2	1	4	3	1
2	25	5	4	0	5	6	2	3	3	2	1	6	4	6	3	3	3	3	3	3	3	3	3	3	3	3	3	3	3	3	3	3	3	3	3	3	3	1	3	3	2
1	22	5	2	3	2	7	1	2	5	1	1	5	6	1	5	3	1	1	2	3	4	3	1	3	1	1	1	1	1	1	1	1	1	1	1	1	1	1	1	1	1
2	32	5	4	0	3	7	1	2	3	2	3	7	3	2	2	3	1	1	3	3	2	3	1	2	1	1	1	1	2	1	4	1	1	1	2	1	3	1	3	4	1
2	18	5	4	0	3	7	1	3	3	2	3	5	2	2	3	4	1	1	2	3	3	2	1	3	2	1	2	4	1	1	2	2	4	1	5	1	2	2	5	2	2
1	21	5	2	3	4	7	1	3	5	1	1	6	3	1	3	4	1	1	2	4	1	2	1	3	4	1	1	1	1	1	3	1	4	1	5	1	2	1	1	3	2
2	20	5	4	0	3	6	1	3	3	2	1	5	2	1	4	2	3	2	3	2	3	3	2	2	3	3	4	2	3	1	3	2	2	2	3	3	2	3	3	2	3
2	20	4	2	3	1	7	1	3	3	1	1	4	2	1	4	3	2	2	4	4	4	2	1	3	2	2	2	3	2	2	4	2	4	2	5	2	4	1	2	2	2
2	20	5	4	0	1	1	1	3	3	2	2	7	3	2	1	2	1	1	2	4	1	1	1	2	4	1	1	1	1	1	2	1	4	2	5	1	2	1	1	4	1
1	27	3	4	0	1	7	3	7	5	3	3	4	3	3	2	3	1	1	4	5	2	1	1	1	1	2	1	1	1	1	5	1	1	1	4	1	4	3	4	4	1
1	27	5	4	0	5	7	2	3	3	2	2	7	3	2	2	3	1	3	5	1	1	1	1	3	1	1	1	1	2	2	3	4	2	1	3	1	3	1	5	1	1
2	49	5	4	0	2	7	2	7	4	3	3	7	4	6	4	4	1	2	4	4	4	1	1	2	1	1	1	1	1	1	4	3	4	1	5	2	4	1	3	4	2
2	22	5	4	0	2	6	2	4	2	4	2	7	5	3	4	2	1	1	4	4	4	1	1	5	1	1	2	1	1	1	5	2	4	1	5	1	4	1	3	4	1
2	25	7	4	6	2	5	1	2	2	1	1	7	3	3	4	3	3	3	3	3	3	3	3	3	3	3	3	3	3	3	3	3	2	2	4	3	4	2	4	3	2

## Sheet: Variable description
Supplementary file: Variable names and description, Raw data Study 2
Variable name	Label	Values
Sex	Participants' sex	1=male, 2=female
Age	Participants' age
Education	Participants' education	1 = "without school-leaving qualification", 2 = "secondary modern school qualification", 3 = "secondary school leaving certificate/ O-level", 4 = "vocational baccalaureate diploma", 5 = "A level", 6 = "polytechnic degree", 7 = "university degree"
EBQ_01	Do you in any way adopt a vegetarian diet?	1 = "I'm a vegan (no meat, no fish, no milk products, no eggs)", 2 = "I am ovo-lacto-vegetarian (no meat, no fish)", 3 = "I am pescetarian (no meat)", 4 = "I do not restrict my diet with regard to animal products"
EBQ_02	If so, what is the main reason for you not to consume meat?	1 = "health reasons", 2 = "disgust", 3 = "ethical reasons", 4 = "weight loss", 5 = "religious reasons", 6 = "other reasons"
EBQ_03	How many times per week do you consume the following products (on average)? honey	1 = "never", 2 = "once", 3 = "twice", 4 = "three times", 5 = "four times", 6 = "five times", 7 = "six times or more"
EBQ_04	fruits	1 = "never", 2 = "once", 3 = "twice", 4 = "three times", 5 = "four times", 6 = "five times", 7 = "six times or more"
EBQ_05	pork	1 = "never", 2 = "once", 3 = "twice", 4 = "three times", 5 = "four times", 6 = "five times", 7 = "six times or more"
EBQ_06	eggs	1 = "never", 2 = "once", 3 = "twice", 4 = "three times", 5 = "four times", 6 = "five times", 7 = "six times or more"
EBQ_07	pasta/ noodles	1 = "never", 2 = "once", 3 = "twice", 4 = "three times", 5 = "four times", 6 = "five times", 7 = "six times or more"
EBQ_08	red meat	1 = "never", 2 = "once", 3 = "twice", 4 = "three times", 5 = "four times", 6 = "five times", 7 = "six times or more"
EBQ_09	fish / sea food	1 = "never", 2 = "once", 3 = "twice", 4 = "three times", 5 = "four times", 6 = "five times", 7 = "six times or more"
EBQ_10	vegetables	1 = "never", 2 = "once", 3 = "twice", 4 = "three times", 5 = "four times", 6 = "five times", 7 = "six times or more"
EBQ_11	potatoes	1 = "never", 2 = "once", 3 = "twice", 4 = "three times", 5 = "four times", 6 = "five times", 7 = "six times or more"
EBQ_12	poultry	1 = "never", 2 = "once", 3 = "twice", 4 = "three times", 5 = "four times", 6 = "five times", 7 = "six times or more"
SD3_01	1. It’s not wise to tell your secrets.	1 = "Disagree strongly", 2 = "Disagree", 3 = "Neither agree nor disagree", 4 = "Agree", 5 = "Agree strongly"
SD3_02	2. People see me as a natural leader.	1 = "Disagree strongly", 2 = "Disagree", 3 = "Neither agree nor disagree", 4 = "Agree", 5 = "Agree strongly"
SD3_03	3. I like to get revenge on authorities.	1 = "Disagree strongly", 2 = "Disagree", 3 = "Neither agree nor disagree", 4 = "Agree", 5 = "Agree strongly"
SD3_04	4. I like to use clever manipulation to get my way.	1 = "Disagree strongly", 2 = "Disagree", 3 = "Neither agree nor disagree", 4 = "Agree", 5 = "Agree strongly"
SD3_05	5. I hate being the center of attention.	1 = "Disagree strongly", 2 = "Disagree", 3 = "Neither agree nor disagree", 4 = "Agree", 5 = "Agree strongly"
SD3_06	6. I avoid dangerous situations.	1 = "Disagree strongly", 2 = "Disagree", 3 = "Neither agree nor disagree", 4 = "Agree", 5 = "Agree strongly"
SD3_07	7. Whatever it takes, you must get the important people on your side.	1 = "Disagree strongly", 2 = "Disagree", 3 = "Neither agree nor disagree", 4 = "Agree", 5 = "Agree strongly"
SD3_08	8. Many group activities tend to be dull without me.	1 = "Disagree strongly", 2 = "Disagree", 3 = "Neither agree nor disagree", 4 = "Agree", 5 = "Agree strongly"
SD3_09	9. Payback needs to be quick and nasty.	1 = "Disagree strongly", 2 = "Disagree", 3 = "Neither agree nor disagree", 4 = "Agree", 5 = "Agree strongly"
SD3_10	10. Avoid direct conflict with others because they may be useful in the future.	1 = "Disagree strongly", 2 = "Disagree", 3 = "Neither agree nor disagree", 4 = "Agree", 5 = "Agree strongly"
SD3_11	11. I know that I am special because everyone keeps telling me so.	1 = "Disagree strongly", 2 = "Disagree", 3 = "Neither agree nor disagree", 4 = "Agree", 5 = "Agree strongly"
SD3_12	12. People often say I’m out of control.	1 = "Disagree strongly", 2 = "Disagree", 3 = "Neither agree nor disagree", 4 = "Agree", 5 = "Agree strongly"
SD3_13	13. It’s wise to keep track of information that you can use against people later.	1 = "Disagree strongly", 2 = "Disagree", 3 = "Neither agree nor disagree", 4 = "Agree", 5 = "Agree strongly"
SD3_14	14. I like to get acquainted with important people.	1 = "Disagree strongly", 2 = "Disagree", 3 = "Neither agree nor disagree", 4 = "Agree", 5 = "Agree strongly"
SD3_15	15. It’s true that I can be mean to others.	1 = "Disagree strongly", 2 = "Disagree", 3 = "Neither agree nor disagree", 4 = "Agree", 5 = "Agree strongly"
SD3_16	16. You should wait for the right time to get back at people.	1 = "Disagree strongly", 2 = "Disagree", 3 = "Neither agree nor disagree", 4 = "Agree", 5 = "Agree strongly"
SD3_17	17. I feel embarrassed if someone compliments me.	1 = "Disagree strongly", 2 = "Disagree", 3 = "Neither agree nor disagree", 4 = "Agree", 5 = "Agree strongly"
SD3_18	18. People who mess with me always regret it.	1 = "Disagree strongly", 2 = "Disagree", 3 = "Neither agree nor disagree", 4 = "Agree", 5 = "Agree strongly"
SD3_19	19. There are things you should hide from other people to preserve your reputation.	1 = "Disagree strongly", 2 = "Disagree", 3 = "Neither agree nor disagree", 4 = "Agree", 5 = "Agree strongly"
SD3_20	20. I have been compared to famous people.	1 = "Disagree strongly", 2 = "Disagree", 3 = "Neither agree nor disagree", 4 = "Agree", 5 = "Agree strongly"
SD3_21	21. I have never gotten into trouble with the law.	1 = "Disagree strongly", 2 = "Disagree", 3 = "Neither agree nor disagree", 4 = "Agree", 5 = "Agree strongly"
SD3_22	22. Make sure your plans benefit yourself, not others.	1 = "Disagree strongly", 2 = "Disagree", 3 = "Neither agree nor disagree", 4 = "Agree", 5 = "Agree strongly"
SD3_23	23. I am an average person.	1 = "Disagree strongly", 2 = "Disagree", 3 = "Neither agree nor disagree", 4 = "Agree", 5 = "Agree strongly"
SD3_24	24. I enjoy having sex with people I hardly know.	1 = "Disagree strongly", 2 = "Disagree", 3 = "Neither agree nor disagree", 4 = "Agree", 5 = "Agree strongly"
SD3_25	25. Most people can be manipulated.	1 = "Disagree strongly", 2 = "Disagree", 3 = "Neither agree nor disagree", 4 = "Agree", 5 = "Agree strongly"
SD3_26	26. I insist on getting the respect I deserve.	1 = "Disagree strongly", 2 = "Disagree", 3 = "Neither agree nor disagree", 4 = "Agree", 5 = "Agree strongly"
SD3_27	27. I’ll say anything to get what I want.	1 = "Disagree strongly", 2 = "Disagree", 3 = "Neither agree nor disagree", 4 = "Agree", 5 = "Agree strongly"
